# Supplementary material for: Genome survey sequencing ofAtractylodes lanceaand identification of its SSR markers
Source: Oxford University Press journal article supplement (doi:10.1042/bsr20202709), 2020-10-01
Supplement: bsr-2020-2709_supp.pdf [file bsr-2020-2709_supp.pdf]

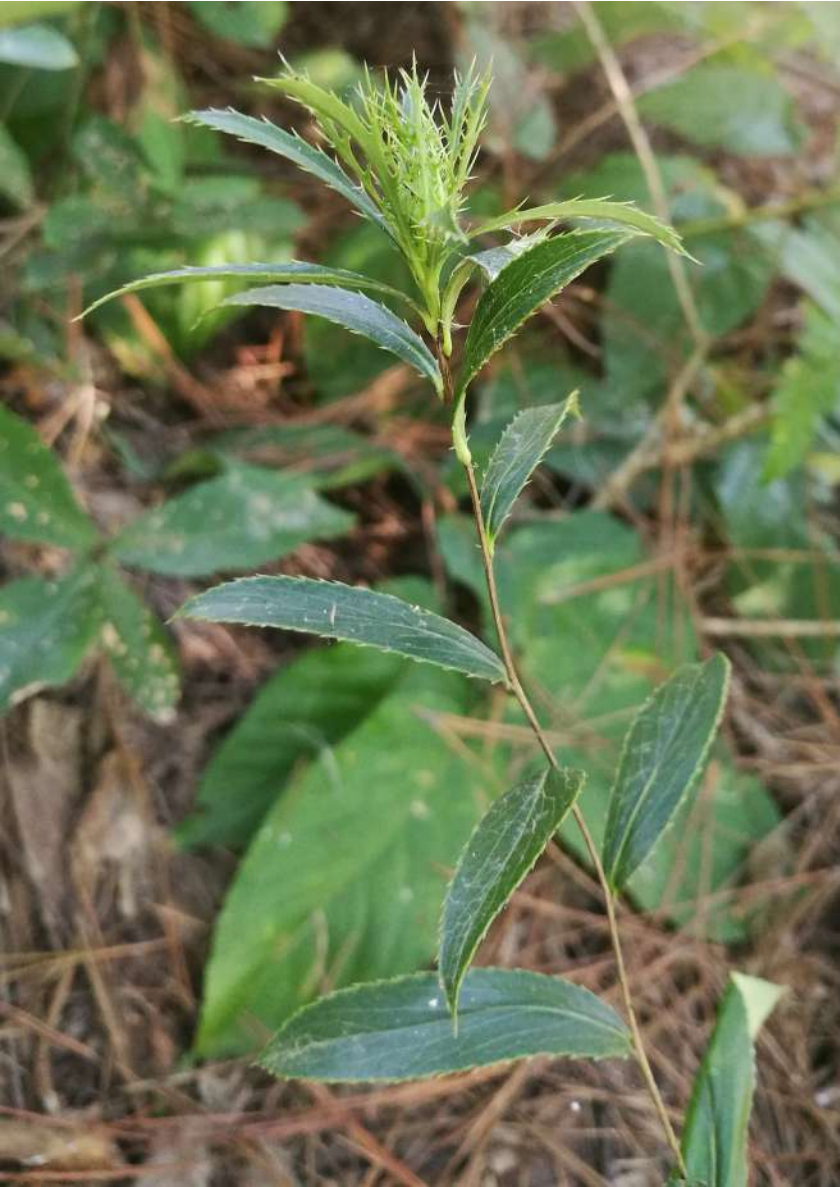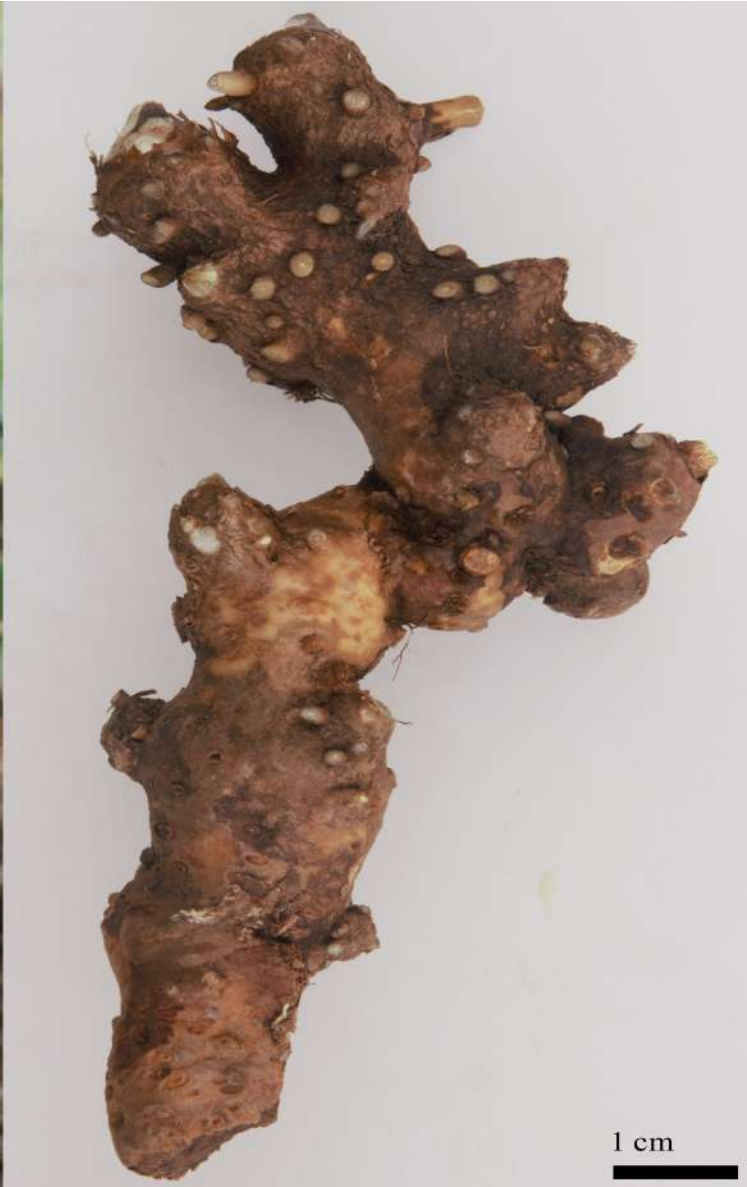

**Supplementary Figure S1.** Plants and rhizome of *A.lancea*

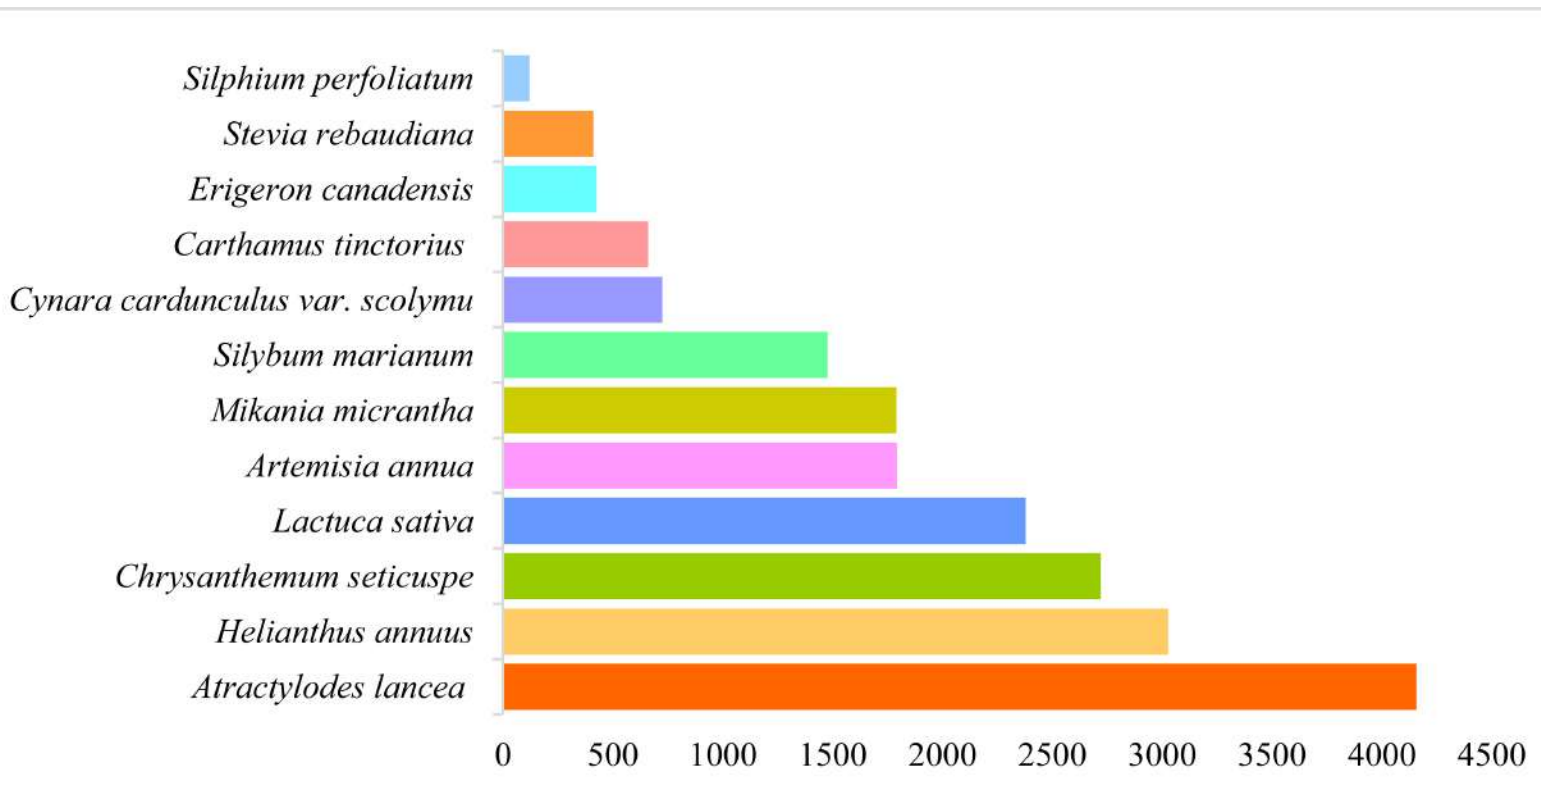

**Supplementary Figure S2.** Comparison the genome size of 12 species of Compositae

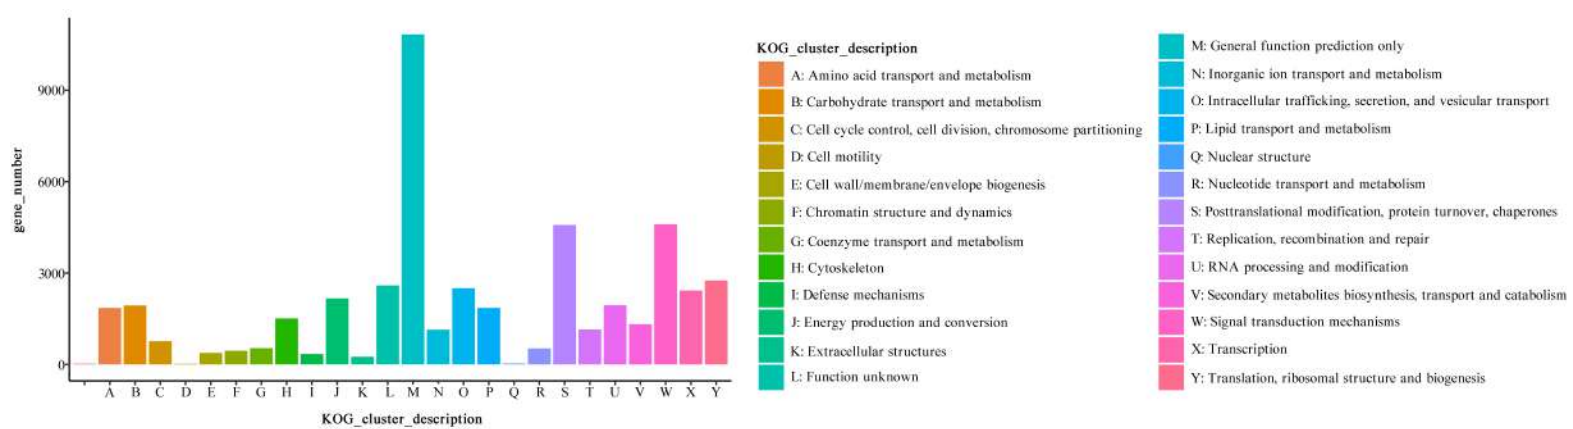

**Supplementary Figure S3.**KOG functional classification of *A. lanceaunigenes*.

NR\_annotation\_stats

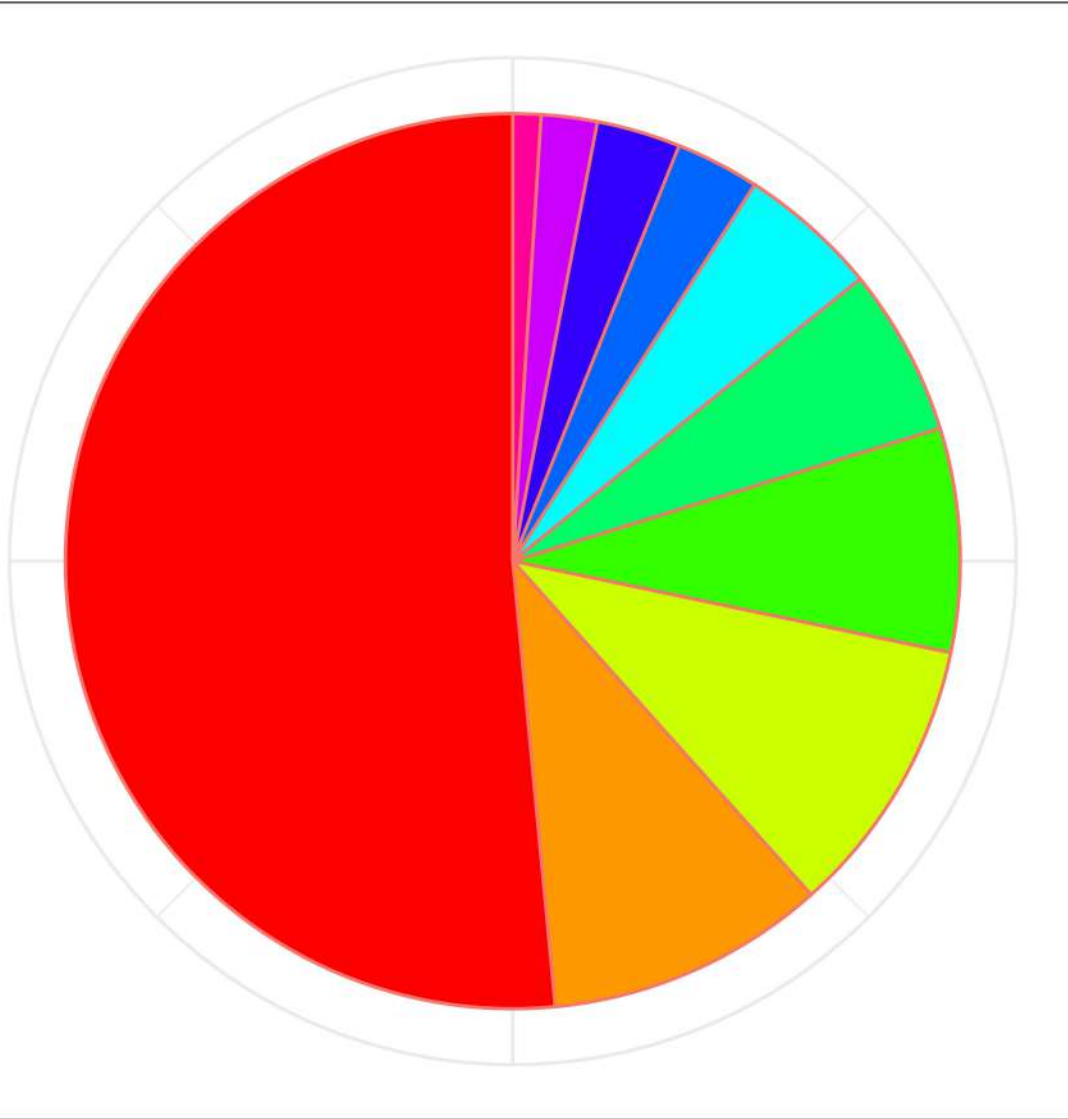

NR\_annotation\_ratio

species

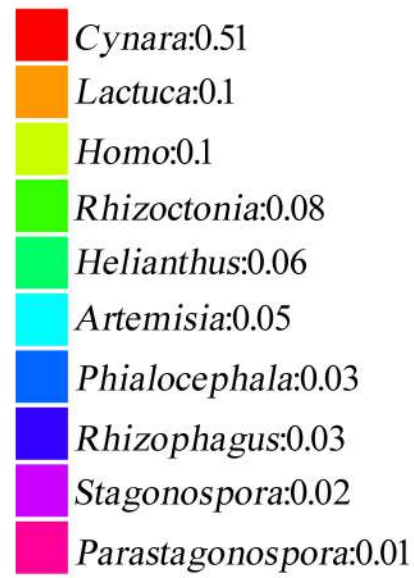

**Supplementary Figure S4.** NR annotated homologous species distributions



**Supplementary Table S1.** Statistics of filtering data

| Lib id                                      | Length | Raw data       | Clean data     | GC rate |
|---------------------------------------------|--------|----------------|----------------|---------|
| 190626_I9_V300022484_L3_RHIs<br>hvDAAAA-573 | 150    | 14,518,852,200 | 14,249,431,800 | 38.98   |
| 190626_I9_V300022484_L3_RHIs<br>hvDAAAA-574 | 150    | 16,785,220,500 | 16,471,137,000 | 38.91   |
| 190626_I9_V300022484_L3_RHIs<br>hvDAAAA-575 | 150    | 14,729,106,000 | 14,448,511,200 | 38.9    |
| 190626_I9_V300022484_L3_RHIs<br>hvDAAAA-576 | 150    | 13,615,597,500 | 13,348,510,200 | 38.93   |
| 190626_I9_V300022484_L3_RHIs<br>hvDAAAA-577 | 150    | 15,861,435,600 | 15,566,351,400 | 38.89   |
| 190626_I9_V300022484_L3_RHIs<br>hvDAAAA-578 | 150    | 16,151,568,000 | 15,851,755,800 | 38.94   |
| 190626_I9_V300022484_L3_RHIs<br>hvDAAAA-579 | 150    | 17,966,042,100 | 17,646,709,500 | 38.87   |
| 190626_I9_V300022484_L3_RHIs<br>hvDAAAA-580 | 150    | 14,990,523,000 | 14,716,546,800 | 38.94   |
| 190626_I9_V300022484_L4_RHIs<br>hvDAAAA-573 | 150    | 15,333,206,400 | 14,993,685,600 | 38.88   |
| 190626_I9_V300022484_L4_RHIs<br>hvDAAAA-574 | 150    | 17,745,398,100 | 17,352,470,700 | 38.8    |
| 190626_I9_V300022484_L4_RHIs<br>hvDAAAA-575 | 150    | 15,459,255,300 | 15,108,670,500 | 38.81   |
| 190626_I9_V300022484_L4_RHIs<br>hvDAAAA-576 | 150    | 14,491,109,700 | 14,161,733,400 | 38.8    |
| 190626_I9_V300022484_L4_RHIs<br>hvDAAAA-577 | 150    | 16,822,270,200 | 16,451,535,000 | 38.78   |
| 190626_I9_V300022484_L4_RHIs<br>hvDAAAA-578 | 150    | 17,067,861,600 | 16,689,940,500 | 38.84   |
| 190626_I9_V300022484_L4_RHIs<br>hvDAAAA-579 | 150    | 18,935,608,800 | 18,532,550,100 | 38.77   |
| 190626_I9_V300022484_L4_RHIs<br>hvDAAAA-580 | 150    | 15,874,163,700 | 15,529,107,600 | 38.84   |

**Supplementary Table S2.** Genome assembly statistics of *A. lancea* and comparisons to 11 genomes of Compositae

| Species                                        | Gene size (Mb) | Number of protein-coding genes | GC content (%) | Heterozygosity (%) | Repeat (%) | References                                   |
|------------------------------------------------|----------------|--------------------------------|----------------|--------------------|------------|----------------------------------------------|
| <i>Atractylodes lancea</i>                     | 4159.24        | n.c                            | 38.4           | 2.28               | 89.2       | This study                                   |
| <i>Carthamus tinctorius</i> (safflower)        | 661.938        | n.c                            | 37.3           | n.c                | n.c        | Bower, J.E, 2016                             |
| <i>Stevia rebaudiana</i>                       | 411.38         | n.c                            | 34.6           | n.c                | n.c        | n.c                                          |
| <i>Chrysanthemum seticuspe</i>                 | 2721.84        | n.c                            | 36.1           | n.c                | 72.5       | Hideki, 2019                                 |
| <i>Silphium perfoliatum</i>                    | 121.712        | n.c                            | 36.7           | n.c                | n.c        | n.c                                          |
| <i>Silybum marianum</i>                        | 1477.58        | n.c                            | 37.2           | n.c                | n.c        | n.c                                          |
| <i>Erigeron canadensis</i>                     | 425.611        | n.c                            | 34             | 0.203              | 42.9       | Laforest et al., 2020<br>Peng et al., 2014   |
| <i>Mikania micrantha</i>                       | 1790.64        | 46329                          | 36.2           | n.c                | n.c        | n.c                                          |
| <i>Cynara cardunculus</i> var. <i>scolymus</i> | 725.198        | 38406                          | 36.75          | n.c                | n.c        | Caglione et al., 2016                        |
| <i>Lactuca sativa</i>                          | 2380           | 38919                          | 37.75          | n.c                | n.c        | Verwaaijen et al., 2017<br>Reye et al., 2016 |
| <i>Artemisia annua</i>                         | 1792.86        | 66918                          | 34.1           | 1.0-1.5            | 60.1       | Shen et al., 2018                            |
| <i>Helianthus annuus</i>                       | 3027.84        | 73839                          | 38.91          | n.c                | n.c        | Bock et al., 2014<br>Badouin et al., 2017    |

**Supplementary Table S3.** Statistics of gene functional annotation

| Data_base  | annotated_number | annotated_ratio |
|------------|------------------|-----------------|
| GO         | 33896            | 24%             |
| KEGG       | 34929            | 24%             |
| KOG        | 48493            | 34%             |
| nr         | 91165            | 64%             |
| pfam       | 58121            | 41%             |
| swiss_prot | 60411            | 42%             |
| TrEMBL     | 92046            | 65%             |
| Total      | 93434            | 66%             |
